# Supplementary material for: Process quality of decision-making in multidisciplinary cancer team meetings: a structured observational study
Source: PubMed Central journal article supplement (PMC5693525; doi:10.1186/s12885-017-3768-5), 2017-11-17
Supplement: 12885_2017_3768_MOESM2_ESM.pdf [file 12885_2017_3768_MOESM2_ESM.pdf]

Additional file B. Frequencies of ratings for case-level variables (N=249 cases<sup>b</sup>).

|                                                          | Frequency (%) of ratings (on five-point Likert scale) |              |               |               |                     |
|----------------------------------------------------------|-------------------------------------------------------|--------------|---------------|---------------|---------------------|
|                                                          | 1 (lowest quality)                                    | 2            | 3             | 4             | 5 (highest quality) |
| <u>Rating of information presented</u>                   |                                                       |              |               |               |                     |
| Quality of case history                                  | 2<br>(0.8%)                                           | 1<br>(0.4%)  | 7<br>(2.8%)   | 4<br>(1.6%)   | 234<br>(94.4%)      |
| Quality of radiological information                      | 27<br>(10.9%)                                         | 0<br>(0.0%)  | 7<br>(2.8%)   | 13<br>(5.2%)  | 201<br>(81.0%)      |
| Quality of information on comorbidities                  | 149<br>(60.1%)                                        | 0<br>(0.0%)  | 53<br>(21.4%) | 21<br>(8.5%)  | 25<br>(10.1%)       |
| Quality of psychosocial information                      | 198<br>(79.8%)                                        | 2<br>(0.8%)  | 34<br>(13.7%) | 10<br>(4.0%)  | 4<br>(1.6%)         |
| Quality of information on patient view                   | 214<br>(86.3%)                                        | 0<br>(0.0%)  | 11<br>(4.4%)  | 17<br>(6.9%)  | 6<br>(2.4%)         |
| <u>Rating of quality of team processes</u>               |                                                       |              |               |               |                     |
| Quality of MDTM chair behavior                           | 144<br>(58.3%)                                        | 19<br>(7.7%) | 47<br>(19.0%) | 32<br>(13.0%) | 5<br>(2.0%)         |
| Quality of team behavior                                 | 5<br>(2.0%)                                           | 9<br>(3.6%)  | 18<br>(7.3%)  | 73<br>(29.6%) | 142<br>(57.5%)      |
| Medical and treatment uncertainty during case discussion | 93<br>(37.8%)                                         | 9<br>(3.7%)  | 57<br>(23.2%) | 11<br>(4.5%)  | 76<br>(30.9%)       |

Note. <sup>b</sup> Due to missing values number of cases analyzed per variable ranged from 246 to 249 cases.
