# Supplementary material for: Process quality of decision-making in multidisciplinary cancer team meetings: a structured observational study
Source: Springer Nature journal article supplement (doi:10.1186/s12885-017-3768-5), 2017-11-17
Supplement: MOESM1 [file 15233732]

**Adapted version of the MDT-MODE: Rating scale for the quality of decision-making processes in MDTMs**

Tumor board specialization:

Date:

Nr. of participants:

Place:

Start time:

End time:

| #  | Information |       |              |                       |         |              | Team processes       |       |      |             | Outcome |                        | Free text | Min/<br>case |
|----|-------------|-------|--------------|-----------------------|---------|--------------|----------------------|-------|------|-------------|---------|------------------------|-----------|--------------|
|    | History     | X-ray | Co-morbidity | Palliative case (0/1) | Psy/Soc | Patient view | Nr. of contributions | Chair | Team | Uncertainty | Y/D/N   | Nr. of recommendations |           |              |
| 1  |             |       |              |                       |         |              |                      |       |      |             |         |                        |           |              |
| 2  |             |       |              |                       |         |              |                      |       |      |             |         |                        |           |              |
| 3  |             |       |              |                       |         |              |                      |       |      |             |         |                        |           |              |
| 4  |             |       |              |                       |         |              |                      |       |      |             |         |                        |           |              |
| 5  |             |       |              |                       |         |              |                      |       |      |             |         |                        |           |              |
| 6  |             |       |              |                       |         |              |                      |       |      |             |         |                        |           |              |
| 7  |             |       |              |                       |         |              |                      |       |      |             |         |                        |           |              |
| 8  |             |       |              |                       |         |              |                      |       |      |             |         |                        |           |              |
| 9  |             |       |              |                       |         |              |                      |       |      |             |         |                        |           |              |
| 10 |             |       |              |                       |         |              |                      |       |      |             |         |                        |           |              |
| 11 |             |       |              |                       |         |              |                      |       |      |             |         |                        |           |              |
| 12 |             |       |              |                       |         |              |                      |       |      |             |         |                        |           |              |
| 13 |             |       |              |                       |         |              |                      |       |      |             |         |                        |           |              |
| 14 |             |       |              |                       |         |              |                      |       |      |             |         |                        |           |              |
| 15 |             |       |              |                       |         |              |                      |       |      |             |         |                        |           |              |
| 16 |             |       |              |                       |         |              |                      |       |      |             |         |                        |           |              |
| 17 |             |       |              |                       |         |              |                      |       |      |             |         |                        |           |              |
| 18 |             |       |              |                       |         |              |                      |       |      |             |         |                        |           |              |

|                                                                              |                                                              |                                                                                                                                                                                                                                                                                                                                                                                              |                                                                |                                     |                                                                                                                                                                                                                                                                                                      |
|------------------------------------------------------------------------------|--------------------------------------------------------------|----------------------------------------------------------------------------------------------------------------------------------------------------------------------------------------------------------------------------------------------------------------------------------------------------------------------------------------------------------------------------------------------|----------------------------------------------------------------|-------------------------------------|------------------------------------------------------------------------------------------------------------------------------------------------------------------------------------------------------------------------------------------------------------------------------------------------------|
| Quality of case history („history“)                                          | 5                                                            | Fluent, comprehensive case history:<br>Listing of name, age, major health problem, family diseases, medications                                                                                                                                                                                                                                                                              | Quality of radiological information (“x-ray”)                  | 5                                   | Radiological images were shown and discussed during case discussion                                                                                                                                                                                                                                  |
|                                                                              | 3                                                            | Partial case history                                                                                                                                                                                                                                                                                                                                                                         |                                                                | 3                                   | Radiological information from a report/account                                                                                                                                                                                                                                                       |
|                                                                              | 1                                                            | No case history                                                                                                                                                                                                                                                                                                                                                                              |                                                                | 1                                   | No provision of radiological information                                                                                                                                                                                                                                                             |
| Quality of information on comorbidities (“comorbidity”)                      | 5                                                            | Comprehensive first-hand knowledge of past medical history or performance status<br>Listing of further diseases                                                                                                                                                                                                                                                                              | Palliative case (0/1)                                          | 0                                   | The case was <b>not</b> explicitly defined as palliative                                                                                                                                                                                                                                             |
|                                                                              | 3                                                            | Vague first-hand knowledge or good second-hand knowledge of past medical history or performance status                                                                                                                                                                                                                                                                                       |                                                                | 1                                   | The case was explicitly defined as palliative                                                                                                                                                                                                                                                        |
|                                                                              | 1                                                            | No information on of past medical history or performance status                                                                                                                                                                                                                                                                                                                              |                                                                |                                     |                                                                                                                                                                                                                                                                                                      |
| Quality of psychosocial information („Psy/Soc“)                              | 5                                                            | First-hand knowledge and detailed consideration of information on patient's personal and social circumstances:<br>- <b>profession</b> - <b>marital status, children</b> - <b>living arrangements</b><br><br>First-hand knowledge and detailed consideration of patient's psychological issues :<br>- <b>psychological problems</b> - <b>family problems</b> - <b>psychological disorders</b> | Quality of information on the patient's views (“patient view”) | 5                                   | Comprehensive knowledge and detailed consideration of patient's wishes or opinions regarding treatment:<br>Someone who has met the patient presents their views/preferences/holistic needs                                                                                                           |
|                                                                              | 3                                                            | Vague first-hand knowledge or good second-hand knowledge of patients' personal circumstances, social and psychological issues                                                                                                                                                                                                                                                                |                                                                | 3                                   | Vague first-hand knowledge or good second-hand knowledge of patient's wishes or opinions regarding treatment                                                                                                                                                                                         |
|                                                                              | 1                                                            | No information on patients' personal circumstances, social and psychological issues                                                                                                                                                                                                                                                                                                          |                                                                | 1                                   | No information on patient's wishes or opinions regarding treatment                                                                                                                                                                                                                                   |
| Quality of MDTM chair behavior („chair“)                                     | 5                                                            | Good leadership enhanced team discussion and decision making:<br>- <b>Leader encouraged full participation of all team members</b><br>- <b>Showed assertive behavior</b><br>- <b>Demonstrated ability to resolve conflict</b><br>- <b>Monitored and coordinated contributions of team members</b>                                                                                            | Quality of team behavior (“team”)                              | 5                                   | Good communication between team members:<br>- <b>Open and inclusive team discussion</b><br>- <b>Offering of constructive criticism</b><br>- <b>Climate of respect and equality, harmony within the group</b><br>- <b>Team engagement</b><br>- <b>Group cohesion (more than group of individuals)</b> |
|                                                                              | 3                                                            | Leadership neither enhanced nor impeded team discussion and decision making                                                                                                                                                                                                                                                                                                                  |                                                                | 3                                   | Communication between team members neither good nor poor                                                                                                                                                                                                                                             |
|                                                                              | 1                                                            | Poor/inadequate leadership impeded team discussion and decision making:<br>- <b>Interrupted team members or behaved in a disrespectful manner</b><br>- <b>Participated reluctantly</b><br>- <b>Avoided conflict</b><br>- <b>Leader could not be identified</b>                                                                                                                               |                                                                | 1                                   | Poor communication between team members:<br>- <b>Reluctant contributions of team members</b><br>- <b>Interruption of team members</b><br>- <b>Destructive team discussion</b><br>- <b>Hostile climate and disharmony within the group</b><br>- <b>Poor team engagement and group cohesion</b>        |
| Medical and treatment uncertainty during the case discussion (“uncertainty”) | 5                                                            | Team members showed medical and treatment uncertainty about best treatment decision                                                                                                                                                                                                                                                                                                          | Recommendation reached? (“Y/D/N”)                              | Y                                   | Clear recommendation about treatment(s) was offered                                                                                                                                                                                                                                                  |
|                                                                              | 3                                                            | Some medical and treatment uncertainty about decision was shown, but decision for one option seemed clear                                                                                                                                                                                                                                                                                    |                                                                | D                                   | Recommendation was deferred to next MDTM                                                                                                                                                                                                                                                             |
|                                                                              | 1                                                            | Team members seemed to have same opinion regarding treatment decision, no further treatment options mentioned                                                                                                                                                                                                                                                                                |                                                                | N                                   | No recommendation or recommendation unclear                                                                                                                                                                                                                                                          |
| Number of active participants (“Nr. of contributions”)                       | Number of active participants contributing to the discussion |                                                                                                                                                                                                                                                                                                                                                                                              | Number of recommendations                                      | Number of treatment recommendations |                                                                                                                                                                                                                                                                                                      |
| Minutes per case (“Min/case”)                                                | Minutes spent on discussing each case                        |                                                                                                                                                                                                                                                                                                                                                                                              | Free text                                                      | Additional observer comments        |                                                                                                                                                                                                                                                                                                      |
